# Supplementary material for: Exercise-Induced Splanchnic Hypoperfusion Results in Gut Dysfunction in Healthy Men
Source: PubMed Central journal article supplement (PMC3141050; doi:10.1371/journal.pone.0022366), 2011-07-21
Supplement: pone.0022366.s001.pdf [file pone.0022366.s001.pdf]

# Supporting Information

## GI PERFUSION

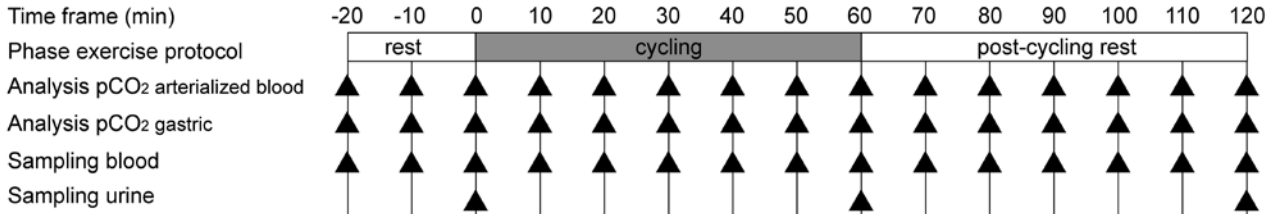

## INTESTINAL DAMAGE

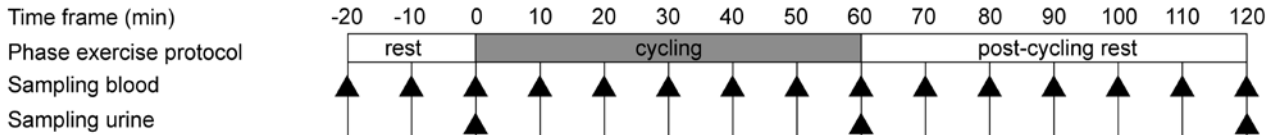

## GI PERMEABILITY

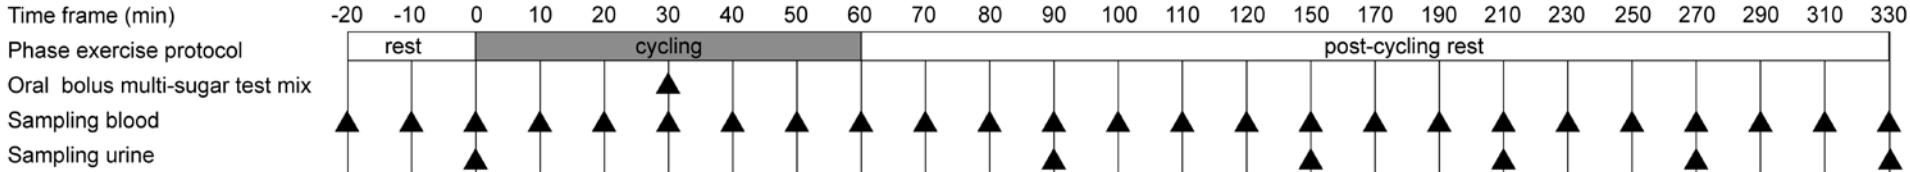

Figure S1. Time frame of GI perfusion, intestinal damage and GI permeability study.
